# Supplementary material for: Voice disorder in systemic lupus erythematosus
Source: PLoS One. 2017 Apr 17;12(4):e0175893. doi: 10.1371/journal.pone.0175893 (PMC5393869; doi:10.1371/journal.pone.0175893)
Supplement: S5 Table — (XLSX) [file pone.0175893.s005.xlsx]

## Sheet: SLICC-ACR damage index score
PATIENT NUMBER	OCULAR		NEUROPSYCHIACTRIC					RENAL			PULMONARY					CARDIOVASCULAR					PERIPHERAL VASCULAR				GASTROINTESTINAL					MUSCULOSKELETAL						SKIN			PREMATURE GONADAL FAILURE	DIABETES	MALIGNANCY	SUM
	Cataract	Retinal change or optic atrophy	Cognitive impairment	Seizures requiring therapy for 6 months	CVA	Cranial or peripheral neuropathy	Transverse myelitis	Estimated or measured glomerular filtration rate < 50%	Proteinuria ≥ 3.5 g/24h	End-stage renal disease	Pulmonary hypertension	Pulmonary fibrosis	Shrinking lung	Pleural fibrosis	Pulmonary infarction	Angina or coronary artery bypass	Myocardial infarction	Cardiomyopathy	Valvular disease	Pericarditis	Claudication for 6 months or pericardiectomy	Minor tissue loss	Significant tissue loss	Venous thrombosis	Infarction or ressection of bowel below duodenum, spleen, liver, or gall bladder	Mesenteric isufficiency	Chronic peritonitis	Stricture or upper gastrointestinal tract surgery	Chronic peritonitis	Muscle atrophy or weakness	Deforming or erosive arthritis	Osteoporosis	Avascular necrosis			Scarring chronic alopecia	Extensive scarring or panniculum other than scalp and pulp space	Skin ulceration
1	0	0	0	0	0	0	0	1	1	0	0	0	0	0	0	0	0	0	1	0	1	0	0	0	0	0	0	0	0	1	1	0	0			1	1	1	1	1	0	11
2	0	0	0	0	0	0	0	1	1	3	0	1	0	1	0	0	0	2	0	1	0	0	0	0	0	0	0	0	0	1	1	1	0			1	0	1	0	0	0	15
3	0	0	0	0	0	0	0	1	1	0	0	0	0	0	0	0	0	0	1	1	0	0	0	0	0	0	0	0	0	1	1	1	0			1	1	1	0	1	0	11
4	0	0	0	1	0	0	0	1	1	0	0	0	0	0	0	0	0	0	1	1	0	0	0	0	0	0	0	0	0	1	1	1	0			1	1	1	0	0	0	11
5	0	0	0	0	0	0	0	1	1	0	0	1	0	1	0	0	0	0	1	1	0	0	0	1	0	0	1	0	0	1	1	1	0			1	1	1	0	1	0	15
6	0	0	0	0	0	0	0	0	0	0	0	0	0	0	0	0	0	1	0	0	0	0	0	0	0	0	1	0	0	1	1	0	0			1	0	0	0		0	5
7	0	0	0	0	0	0	0	1	1	0	0	1	0	1	0	0	0	1	0	0	0	0	0	0	0	0	0	0	0	1	1	0	0			1	0	0	0	1	0	9
8	0	0	0	0	0	0	0	1	1	3	0	1	0	1	0	0	0	1	1	0	0	0	0	0	0	0	0	0	0	1	1	0	0			1	1	0	1	1	0	15
9	0	0	0	0	0	0	0	1	1	0	0	1	0	0	0	0	0	0	1	0	0	0	0	0	0	0	0	0	0	1	1	0	0			1	0	0	0	0	0	7
10	0	0	0	0	0	0	0	1	1	3	0	1	0	1	0	0	0	0	1	0	1	0	0	0	0	0	1	0	0	1	1	0	0			1	1	0	0	1	0	15
11	0	0	0	0	0	0	0	0	0	0	0	0	0	0	0	0	0	0	1	0	0	0	0	1	0	0	0	0	0	1	1	0	0			1	0	0	0	0	0	5
12	0	0	0	0	0	0	0	0	0	0	0	0	0	0	0	0	0	1	0	0	0	0	0	0	0	0	0	0	0	1	0	0	0			1	0	0	1	0	0	4
13	0	0	0	0	0	0	0	0	1	0	0	1	0	0	0	0	0	0	1	0	0	0	0	0	0	0	0	0	0	1	0	0	0			1	0	0	0	0	0	5
14	0	0	0	1	1	0	0	0	1	0	0	0	0	0	0	0	0	0	1	0	0	0	0	0	0	0	0	0	0	1	0	0	0			1	0	0	0	0	0	6
15	0	0	0	0	0	0	0	0	1	0	0	0	0	0	0	0	0	0	0	1	0	0	0	0	0	0	0	0	0	1	0	0	0			1	0	0	0	1	0	5
16	0	0	0	0	0	0	0	0	1	0	0	1	0	0	0	0	0	0	1	0	0	0	0	0	0	0	0	0	0	1	0	0	0			1	0	0	0	1	0	6
17	0	0	0	0	0	0	0	1	1	0	0	1	0	1	0	0	1	1	0	0	0	0	1	0	0	0	0	0	0	1	1	0	0			1	0	1	1	1	0	13
18	0	0	0	0	0	0	0	1	1	0	0	1	0	1	0	0	0	1	1	0	0	0	0	0	0	0	0	0	1	1	1	0	0			1	0	0	0	0	0	10
19	0	0	0	0	0	0	0	0	1	0	0	1	0	0	0	0	0	0	1	0	0	0	0	0	0	0	0	0	0	1	0	0	0			1	0	0	0	0	0	5
20	0	0	0	0	0	0	0	0	1	0	0	1	0	0	0	0	0	0	1	0	0	0	0	0	0	0	0	0	0	1	1	0	0			1	0	0	0	1	0	7
21	0	0	0	0	0	0	0	0	1	0	0	1	0	0	0	0	0	0	1	0	1	0	0	0	0	0	0	0	0	1	1	0	0			1	1	0	0	1	0	9
22	0	0	0	0	0	0	0	0	1	0	0	1	0	0	0	0	0	0	1	0	0	0	0	0	0	0	0	0	0	1	0	0	0			1	0	0	0	0	0	5
23	0	0	0	0	0	0	0	1	1	0	0	1	0	1	0	0	0	0	1	1	0	0	0	0	0	0	0	0	0	1	1	0	0			1	0	0	1	0	0	10
24	0	0	0	0	0	0	0	0	1	0	0	1	0	0	0	0	0	0	1	0	0	0	0	0	0	0	1	0	0	0	1	0	0			1	0	0	1	0	0	7
25	0	0	0	0	0	0	0	0	1	0	0	1	0	1	0	0	0	0	1	0	0	0	0	0	0	0	1	0	0	0	1	0	0			1	0	0	0	1	0	8
26	0	0	0	0	0	0	0	0	0	0	0	0	0	0	0	0	0	0	0	0	0	0	0	0	0	0	0	0	0	1	1	0	0			1	0	0	0	0	0	3
27	0	0	0	0	0	0	0	0	1	0	0	1	0	0	0	0	0	0	1	0	0	0	0	0	0	0	0	0	0	1	0	0	0			1	0	0	0	0	0	5
28	0	0	0	1	1	0	0	0	1	0	0	1	0	0	0	0	0	0	0	0	0	0	0	0	0	0	0	0	0	1	0	0	0			1	0	0	0	0	0	6
29	0	0	0	1	1	0	0	0	1	0	0	0	0	0	0	0	0	0	1	0	0	0	0	0	0	0	0	0	0	1	0	0	0			1	0	0	0	0	0	6
30	0	0	0	0	0	0	0	0	1	0	0	0	0	0	0	0	0	0	1	0	1	0	0	0	0	0	0	0	0	1	0	0	0			1	0	0	0	0	0	5
31	0	0	0	0	0	0	0	0	1	0	0	0	0	0	0	0	0	0	1	0	0	0	0	0	0	0	0	0	0	1	1	0	0			1	1	0	0	0	0	6
32	0	0	0	0	0	0	0	0	0	0	0	0	0	0	0	0	0	0	1	0	0	0	0	0	0	0	1	0	0	1	1	0	0			1	1	0	0	0	0	6
33	0	0	0	0	0	0	0	1	1	0	0	0	0	0	0	0	0	0	1	0	0	0	0	0	0	0	0	0	0	1	1	0	0			1	0	0	0	0	0	6
34	0	0	0	0	0	0	0	1	1	0	0	0	0	0	0	0	0	0	1	0	0	0	0	0	0	0	0	0	0	1	0	0	0			0	0	0	0	0	0	4
35	0	0	0	0	0	0	0	1	1	0	0	0	0	0	0	0	0	0	0	0	0	0	0	0	0	0	0	0	0	1	0	0	0			1	0	0	0	0	0	4
36	0	0	0	0	0	0	0	1	1	0	0	1	0	0	0	0	0	0	1	1	0	0	0	0	0	0	0	0	0	1	0	0	0			1	0	0	0	0	0	7

## Sheet: Legend
	Table legend
	Supplemental Table 5. Individual values of all SLICC/ACR damage scores for each symptom and for each SLE patient.
